# Supplementary material for: A homogeneous split-luciferase assay for rapid and sensitive detection of anti-SARS CoV-2 antibodies
Source: PubMed Central journal article supplement (PMC7985487; doi:10.1038/s41467-021-22102-6), 2021-03-22
Supplement: 41467_2021_22102_MOESM1_ESM.pdf [file 41467_2021_22102_MOESM1_ESM.pdf]

## Supplementary methods: nucleotide sequences of the constructs

### 1. $\Delta 11S$

```
1 ATGggccatc atcatcatca tcatcatcat ATGgttttta cacttgaaga ttttgtgggt
61 gattgggaac aaactgctgc atataattta gatcaagttt tagaacaggg tggagtgagt
121 tctcttttac aaaatcttgc agtctcagtt acaccaatac aaagaatagt tagaagtgga
181 gaaaatgcat taaagatcga tatacatgta ataattcctt atgagggact atcagcagac
241 caaatggcac aaattgagga agtattcaaa gttgtatatac cagtagacga tcatcacttt
301 aaagtaatat taccttatgg aacttttagta attgatgggtg taacaccaa taatgttaaat
361 tattttggta gaccatacga agggattgca gtttttgatg gaaagaaaat aaccgtaaca
421 ggcactttgt ggaatggaaa taaaataata gatgaaaggt taattacacc tgatTAA
```

### 2. $\beta 9-G$

```
1 ATGGGCTCCA TGCTGTTCCG AGTAACCATC AACAGTggag gtggatccGG TGGTGGAGGG
61 AGCacctaca aacttGtcAT Taacggtaaa accctgaaag gtgaaaccac caccgaagct
121 gttgacgctg ctaccgcgga aaaagttttc aaacagtacg ctaacgacaa cgggtgttgac
181 ggtgaatgga cctacgacga cgctaccaa acctTcaccg taacggaaGG TGGCGGTAGC
241 catcaccacc atcaccacTG A
```

### 3. G- $\beta 9$

```
1 ATGggccatc atcatcatca tcatGGTGGGA GGGAGCacct acaaacttGt cATTaacgggt
61 aaaaccctga aaggtgaaac caccaccgaa gctgttgacg ctgctaccgc ggaaaaagtt
121 ttcaaacagt acgctaacga caacgggtgtt gacgggtgaat ggacctacga cgacgctacc
181 aaaacctTca ccgtaacgga aGGTGGCGGT AGCggtggcg gaggctctGG CTCCATGCTG
241 TTCCGAGTAA CCATCAACAG Ttaa
```

### 4. $\beta 9-G-\beta 9$

```
1 ATGGGCTCCA TGCTGTTCCG AGTAACCATC AACAGTggag gtggatccGG TGGTGGAGGG
61 AGCacctaca aacttGtcAT Taacggtaaa accctgaaag gtgaaaccac caccgaagct
121 gttgacgctg ctaccgcgga aaaagttttc aaacagtacg ctaacgacaa cgggtgttgac
181 ggtgaatgga cctacgacga cgctaccaa acctTcaccg taacggaaGG AGGAGGATCT
241 GGAGGTGGAT CCGGCTCCAT GCTGTTCCGA GTAACCATCA ACAGTGGCGG AAGCCATCAT
301 CACCACCATC ATCACCATTG A
```

### 5. $\beta 10-RBD$

```
1 ATGCGGCTTC CGGGTGCGAT GCCAGCTCTG GCCCTCAAAG GCGAGCTGCT GTTGCTGTCT
61 CTCCTGTTAC TTCTGGAACC ACAGATCTCT CAGGGCGGTG GaGTGAGCGG CTGGCGGCTG
121 TTCAAGAAGA TTAGCGGTGG CGGAGGATCT GGAGGTGGAT CCaggggtgca gccaacggag
181 tctatcgtgc gctttcctaa taccacaaac ctgtgccat ttggcgaggt gttcaacgca
241 acccgcttcg ccagcgtgta cgctggaat aggaagcgga tcagcaactg cgtggccgac
301 tatagcgtgc tgtacaactc cgctctttc agcaccttta agtgctatgg cgtgtcccc
361 acaaagctga atgacctgtg ctttaccac gtctacgccg attctttcgt gatcaggggc
421 gacgaggtgc gccagatcgc ccccgccag acaggcaaga tcgcagacta caattataag
481 ctgccagacg atttcaccgg ctgcgtgatc gcctggaaca gcaacaatct ggattccaaa
541 gtgggcgga actacaatta tctgtaccgg ctgtttagaa agagcaatct gaagcccttc
601 gagagggaca tctctacaga aatctaccag gccggcagca ccccttgcaa tggcgtggag
661 ggctttaact gttatttccc actccagtc tacggcttc agcccacaaa cggcgtgggc
721 tatcagcctt accgctgggt ggtgctgagc tttgagctgc tgcacgccc agcaacagtg
781 tgcggcccca agaagtccac caatctggtg aagaacaagt gcgtgaactt cGGCGGAAGC
841 CATCATCACC ACCATCATCA CCATTGA
```

### 6. RBD- $\beta 10$

```
1 atgttcgtct tcttggctct gctgcctctg gtctcctcac agaggggtgca gccaacggag
61 tctatcgtgc gctttcctaa taccacaaac ctgtgccat ttggcgaggt gttcaacgca
121 acccgcttcg ccagcgtgta cgctggaat aggaagcgga tcagcaactg cgtggccgac
181 tatagcgtgc tgtacaactc cgctctttc agcaccttta agtgctatgg cgtgtcccc
241 acaaagctga atgacctgtg ctttaccac gtctacgccg attctttcgt gatcaggggc
```

301 gacgaggtgc gccagatcgc ccccggccag acaggcaaga tgcagacta caattataag  
 361 ctgccagacg atttcaccgg ctgctgtatc gcctggaaca gcaacaatct ggattccaaa  
 421 gtggggcggca actacaatta tctgtaccgg ctgttttagaa agagcaatct gaagcccttc  
 481 gagagggaca tctctacaga aatctaccag gccggcagca ccccttgcaa tggcgtggag  
 541 ggctttaact gttatttccc actccagtcc tacggcttcc agcccacaaa cggcgtgggc  
 601 tatcagcctt accgcgtggt ggtgctgagc tttgagctgc tgcacgcccc agcaacagtg  
 661 tgcggcccca agaagtccac caatctggtg aagaacaagt gcgtgaactt cGGCGGAGGA  
 721 GGATCTGGAG GTGGATCCGT GAGCGGCTGG CGGCTGTTCA AGAAGATTAG CGGCGGAAGC  
 781 CATCATCACC ACCATCATCA CCATTGA

## 7. $\beta$ 10-RBD- $\beta$ 10

1 ATGCGGCTTC CGGGTGCAT GCCAGCTCTG GCCCTCAAAG GCGAGCTGCT GTTGCTGTCT  
 61 CTCCTGTTAC TTCTGGAACC ACAGATCTCT CAGGGCGGTG GaGTGAGCGG CTGGCGGCTG  
 121 TTCAAGAAGA TTAGCGGTGG CGGAGGATCT GGAGGTGGAT CCagggtgca gccaacccag  
 181 tctatcgtgc gctttcctaa tatcacaac ctgtgcccac ttggcgaggt gttcaacgca  
 241 accgccttcg ccagcgtgta cgcttgaat aggaagcggg tcagcaactg cgtggccgac  
 301 tatagcgtgc tgtacaactc cgctctttc agcaccttta agtgctatgg cgtgtcccc  
 361 acaaagctga atgacctgtg ctttaccac gtctacgccc attctttcgt gatcaggggc  
 421 gacgaggtgc gccagatcgc ccccggccag acaggcaaga tgcagacta caattataag  
 481 ctgccagacg atttcaccgg ctgctgtatc gcctggaaca gcaacaatct ggattccaaa  
 541 gtggggcggca actacaatta tctgtaccgg ctgttttagaa agagcaatct gaagcccttc  
 601 gagagggaca tctctacaga aatctaccag gccggcagca ccccttgcaa tggcgtggag  
 661 ggctttaact gttatttccc actccagtcc tacggcttcc agcccacaaa cggcgtgggc  
 721 tatcagcctt accgcgtggt ggtgctgagc tttgagctgc tgcacgcccc agcaacagtg  
 781 tgcggcccca agaagtccac caatctggtg aagaacaagt gcgtgaactt cGGCGGAGGA  
 841 GGATCTGGAG GTGGATCCGT GAGCGGCTGG CGGCTGTTCA AGAAGATTAG CGGCGGAAGC  
 901 CATCATCACC ACCATCATCA CCATTGA

## 8. $\beta$ 10-S

1 ATGCGGCTTC CGGGTGCAT GCCAGCTCTG GCCCTCAAAG GCGAGCTGCT GTTGCTGTCT  
 61 CTCCTGTTAC TTCTGGAACC ACAGATCTCT CAGGGCGGTG GaGTGAGCGG CTGGCGGCTG  
 121 TTCAAGAAGA TTAGCGGTGG CGGAGGATCT GGAGGTGGAT CCtgcgtcaa tctgacaact  
 181 cggactcagc tgccacctgc ttataactaat agcttcacca gaggcgtgta ctatcctgac  
 241 aagggtgttta gaagctccgt gctgcactct acacaggatc tgtttctgcc attcttttagc  
 301 aacgtgacct ggttccacgc catccacgtg agcggcacca atggcacaaa gcggttcgac  
 361 aatcccgtgc tgctttttaa cgatggcgtg tacttgcct ctaccgagaa gagcaacatc  
 421 atcagaggct ggatctttgg caccacactg gactccaaga cacagtctct gctgatcgtg  
 481 aacaatgcca ccaacgtggt catcaagggtg tgcgagttcc agttttgtaa tgatcccttc  
 541 ctgggcgtgt actatcacia gaacaataag agctggatgg agtccgagtt tagagtgtat  
 601 tctagcgcga acaactgcac atttgagtag gtgagccagc ctttctgat ggacctggag  
 661 ggcaagcagg gcaatttcaa gaacctgagg gagttcgtgt ttaagaatat cgacggctac  
 721 ttcaaatct actctaagca ccccccatc aacctggtgc ggcacctgcc tcagggcttc  
 781 agcgccttg agccccgtg ggatctgct atcggcatca acatcacccg gtttcagaca  
 841 ctgctggccc tgcacagaag ctacctgaca cccggcgact cctctagcgg atggaccgcc  
 901 ggcgctgcc cctactatgt gggctacctc cagccccgga ccttctgct gaagtacaac  
 961 gagaatggca ccatcacaga cgcagtggat tgcgcccctgg accccctgag cgagacaaag  
 1021 tgtacactga agtcccttac cgtggagaag ggcactatc agacatccaa tttcaggggtg  
 1081 cagccaaccg agtctatcgt gcgctttcct aatatcacia acctgtgccc atttggcgag  
 1141 gtgttcaacg caacctgcct cgccagcgtg tacgctgga ataggaagcg gatcagcaac  
 1201 tgcgtggccg actatagcgt gctgtacaac tccgcctct ttagcactt taagtctat  
 1261 ggcgtgtccc ccacaaagct gaatgacctg tgcctttacca acgtctacgc cgattctttc  
 1321 gtgatcaggg gcgacgaggt gcgccagatc gccccggcc agacaggcaa gatcgagac  
 1381 tacaattata agctgccaga cgatttcacc ggctgctgta tgcctggaa cagcaacaat  
 1441 ctggattcca aagtgggcgg caactacaat tatctgtacc ggctgtttag aaagagcaat  
 1501 ctgaagccct tcgagagggg catctctaca gaaatctacc aggcggcag cacccttgc  
 1561 aatggcgtgg agggctttaa ctgttatttc ccaactccagt cctacggctt ccagcccaca  
 1621 aacggcgtgg gctatcagcc ttaccgcgtg gtggtgctga gctttgagct gctgcacgcc

|      |             |             |            |            |            |             |
|------|-------------|-------------|------------|------------|------------|-------------|
| 1681 | ccagcaacag  | tgtgcgggccc | caagaagtcc | accaatctgg | tgaagaacaa | gtgCGTgaac  |
| 1741 | ttcaacttca  | acggcctgac  | cggcacaggc | gtgctgaccg | agtccaacaa | gaagttcctg  |
| 1801 | ccatttcagc  | agttcggcag  | ggacatcgca | gataccacag | acgccgtgcg | cgacccacag  |
| 1861 | accctggaga  | tcctggacat  | cacaccctgc | tctttcggcg | gCGTgagcgt | gatcacaccc  |
| 1921 | ggcaccaata  | caagcaacca  | ggtggccgtg | ctgtatcagg | acgtgaattg | taccgaggtg  |
| 1981 | cccgtggcta  | tccacgccga  | tcagctgacc | ccaacatggc | gggtgtacag | caccggctcc  |
| 2041 | aacgtcttcc  | agacaagagc  | cggatgcctg | atcggagcag | agcacgtgaa | caattcctat  |
| 2101 | gagtgcgaca  | tcccaatcgg  | cgccggcatc | tgtgcctctt | accagacca  | gacaaactct  |
| 2161 | cccGgaagCg  | ccAgCagcgt  | ggcctcccag | tctatcatcg | cctataccat | gtccctgggg  |
| 2221 | gccgagaaca  | gcgtggccta  | ctctaacaat | agcatcgcca | tcccaaccaa | cttcacaatc  |
| 2281 | tctgtgacca  | cagagatcct  | gcccgtgtcc | atgaccaaga | catctgtgga | ctgcacaatg  |
| 2341 | tatatctgtg  | gcgattctac  | cgagtgcagc | aacctgctgc | tccagtacgg | cagcttttgt  |
| 2401 | accagctga   | atagagccct  | gacaggcata | gccgtggagc | aggataagaa | cacacaggag  |
| 2461 | gtgttcgccc  | aggtgaagca  | aatctacaag | accccccta  | tcaaggactt | tggcggcttc  |
| 2521 | aatTTTTccc  | agatcctgcc  | tgatccatcc | aagccttcta | agcggagctt | tatcgaggac  |
| 2581 | ctgctgttca  | acaaggtgac  | cctggccgat | gccggcttca | tcaagcagta | tggcgattgc  |
| 2641 | ctgggcgaca  | tcgcagccag  | ggacctgata | tgcgcccaga | agtttaatgg | cctgaccgtg  |
| 2701 | ctgccacccc  | tgctgacaga  | tgagatgata | gcacagtaca | caagcgcctt | gctggccggc  |
| 2761 | accatcacat  | ccggatggac  | cttcggcgca | ggagccgccc | tccagatccc | ctttgccatg  |
| 2821 | cagatggcct  | ataggttcaa  | cggcatcggc | gtgacccaga | atgtgctgta | cgagaaccag  |
| 2881 | aagctgatcg  | ccaatcagtt  | taactccgcc | atcggcaaga | tccaggacag | cctgtcctct  |
| 2941 | acagccagcg  | ccctgggcaa  | gctccaggat | gtggtgaatc | agaacgcca  | ggccctgaat  |
| 3001 | accctgggtga | agcagctgag  | cagcaacttc | ggcgccatct | ctagcgtgct | gaatgacatc  |
| 3061 | ctgagccggc  | tggacCCTCC  | Tgaggcagag | gtgcagatcg | accggctgat | caccggccgg  |
| 3121 | ctccagagcc  | tccagaccta  | tgtgacacag | cagctgatca | gggccgccga | gatcagggcc  |
| 3181 | agcgccaatc  | tggcagcaac  | caagatgtcc | gagtgcgtgc | tgggccagtc | taagagagtg  |
| 3241 | gactttttgtg | gcaagggcta  | tcacctgatg | tccttccctc | agtctgcccc | acacggcgtg  |
| 3301 | gtgttttctgc | acgtgacctc  | cgtgcccgcg | caggagaaga | acttcaccac | agccccctgcc |
| 3361 | atctgccacg  | atggcaaggc  | ccactttcca | agggagggcg | tgttcgtgtc | caacggcacc  |
| 3421 | cactggtttg  | tgacacagcg  | caatttctac | gagccccaga | tcataccacc | agataacacc  |
| 3481 | tctgtgagcg  | gcaactgtga  | cgtggctatc | ggcatcgtga | acaataccgt | gatgatcca   |
| 3541 | ctccagcccc  | agctggacag  | ctttaaggag | gagctggata | agtatttcaa | gaatcacacc  |
| 3601 | tcccctgacg  | tggatctggg  | cgacatcagc | ggcatcaatg | cctccgtggg | gaacatccag  |
| 3661 | aaggagatcg  | accgcctgaa  | cgaggtggct | aagaatctga | acgagagcct | gatcgacctc  |
| 3721 | caggagctgg  | gcaagtatga  | gcagtacatc | aagtggcccG | GaGGCAGCGG | aGGCTACATC  |
| 3781 | CCCGAGGCC   | CtCGCGAtGG  | aCAGGctTAC | GTGCGCAAGG | ACGGCGAGTG | GGTGTCTGCTG |
| 3841 | AGCACCTTCC  | TGGGCGGAAG  | CCATCATCAC | CACCATCATC | ACCATTGA   |             |

## 9. S-β10

|      |            |             |             |            |             |             |
|------|------------|-------------|-------------|------------|-------------|-------------|
| 1    | atgttCGTct | tcctgggtcct | gctgcctctg  | gtctcctcac | agtgcgtcaa  | tctgacaact  |
| 61   | cggactcagc | tgccacctgc  | ttataactaat | agcttcacca | gaggcgtgta  | ctatcctgac  |
| 121  | aaggtgttta | gaagctccgt  | gctgcactct  | acacaggatc | tgtttctgcc  | attcctttagc |
| 181  | aacgtgacct | ggttccacgc  | catccacgtg  | agcggcacca | atggcacaaa  | gCGgttcgac  |
| 241  | aatcccgtgc | tgctttttaa  | cgatggcgtg  | tacttcgcct | ctaccgagaa  | gagcaacatc  |
| 301  | atcagaggct | ggatcttttg  | caccacactg  | gactccaaga | cacagtctct  | gctgatcgtg  |
| 361  | aacaatgcca | ccaacgtggt  | catcaaggtg  | tgcgagttcc | agttttgtaa  | tgatcccttc  |
| 421  | ctgggCGTgt | actatcacia  | gaacaataag  | agctggatgg | agtccgagtt  | tagagtgtat  |
| 481  | tctagcgcca | acaactgcac  | atttagtgac  | gtgagccagc | ctttcctgat  | ggacctggag  |
| 541  | ggcaagcagc | gcaatttcaa  | gaacctgagc  | gagttcgtgt | ttaagaatat  | cgacggctac  |
| 601  | ttcaaaatct | actctaagca  | cacccccatc  | aacctgggtc | gcgacctgcc  | tcagggtctc  |
| 661  | agcgcctctg | agccccctgg  | ggatctgcct  | atcggcatca | acatcacccg  | gtttcagaca  |
| 721  | ctgctggccc | tgacacagaag | ctacctgaca  | cccggcgact | cctctagcgg  | atggaccgcc  |
| 781  | ggcgtgccc  | cctactatgt  | gggctacctc  | cagccccgga | ccttctctgt  | gaagtacaac  |
| 841  | gagaatggca | ccatcacaga  | cgcagtggtg  | tgcgccctgg | acccccctgag | cgagacaaag  |
| 901  | tgtacactga | agtcctttac  | cgtggagaag  | ggcatctatc | agacatccaa  | tttcaggggtg |
| 961  | cagccaaccg | agtctatcgt  | gcgctttcct  | aatatcacia | acctgtgccc  | atgtggcgag  |
| 1021 | gtgttcaacg | caaccgcctt  | cgccagcgtg  | tacgcctgga | ataggaagcg  | gatcagcaac  |

1081 tgcgtggccg actatagcgt gctgtacaac tccgcctctt tcagcacctt taagtgctat  
1141 ggcgtgtccc ccacaaagct gaatgacctg tgctttacca acgtctacgc cgattctttc  
1201 gtgatcaggg gcgacgaggt gcgccagatc gccccggcc agacaggcaa gatcgagac  
1261 tacaattata agctgccaga cgatttcacc ggctgctga tcgcctggaa cagcaacaat  
1321 ctggattcca aagtgggagg caactacaat tatctgtacc ggctgttag aaagagcaat  
1381 ctgaagccct tcgagagggg catctctaca gaaatctacc aggccggcag cacccttgc  
1441 aatggcgtgg agggctttaa ctgttatttc ccaactccagt cctacggctt ccagcccaca  
1501 aacggcgtgg gctatcagcc ttaccgcgtg gtggtgctga gctttgagct gctgcacgcc  
1561 ccagcaacag tgtgcccggc caagaagtcc accaatctgg tgaagaaca gtgctgtaac  
1621 ttcaacttca acggcctgac cggcacaggc gtgctgaccg agtccaaca gaagttctctg  
1681 ccatttcagc agttcggcag ggacatcgca gataccacag acgcccgtgcg cgaccacag  
1741 accctggaga tcctggacat cacaccctgc tctttcggcg gcgtgagcgt gatcacacc  
1801 ggcaccaata caagcaacca ggtggccgtg ctgtatcagg acgtgaattg taccgaggtg  
1861 cccgtggcta tccacgccga tcagctgacc ccaacatggc ggggtgtacg caccggctcc  
1921 aacgtcttcc agacaagagc cggatgcctg atcggagcag agcacgtgaa caattcctat  
1981 gagtgcgaca tcccaatcgg cgcggcctc tgtgcctctt accagacca gacaaactct  
2041 cccGgaagCg ccAgCagcgt ggccctccag tctatcatcg cctataccat gtccctgggc  
2101 gccgagaaca gcgtggccta ctctaacaat agcatcgcca tcccaacca cttcacaatc  
2161 tctgtgacca cagagatcct gcccggtgctc atgaccaaga catctgtgga ctgcacaatg  
2221 tatactctgtg gcgattctac cgagtgcagc aacctgctgc tccagtagcg cagcttttgt  
2281 acccagctga atagagccct gacaggcctc gccgtggagc aggataagaa cacacaggag  
2341 gtgttcgccc aggtgaagca aatctacaag accccccta tcaaggactt tggcggcttc  
2401 aatTTTTccc agatcctgcc tgatccatcc aagccttcta agcggagctt tatcgaggac  
2461 ctgctgttca acaaggtgac cctggccgat gccggcttca tcaagcagta tggcgattgc  
2521 ctgggagaca tcgcagccag ggacctgatc tgcgccaga agtttaatgg cctgaccgtg  
2581 ctgccacccc tgctgacaga tgagatgatc gcacagtaca caagcgcctt gctggccggc  
2641 accatcacat ccggatggac cttcggcgca ggagccgcc tccagatccc ctttgccatg  
2701 cagatggcct ataggttcaa cggcatcggc gtgaccaga atgtgctgta cgagaaccag  
2761 aagctgatcg ccaatcagtt taactccgac atcggcaaga tccaggacag cctgtcctct  
2821 acagccagcg ccctgggcaa gctccaggat gtggtgaatc agaacgccc ggccctgaat  
2881 accctggtag agcagctgag cagcaacttc ggcgccatct ctagcgtgct gaatgacatc  
2941 ctgagccggc tggacCCTCC Tgaggcagag gtgcagatcg accggctgat caccggccgg  
3001 ctccagagcc tccagaccta tgtgacacag cagctgatca gggccgccga gatcagggcc  
3061 agcgcacaatc tggcagcaac caagatgtcc gagtgcgtgc tgggcccagtc taagagagtg  
3121 gacttttctg gcaagggcta tcacctgatg tcttccctc agtctgcccc acacggcgtg  
3181 gtgtttctgc acgtgacctc cgtgcccgcc caggagaaga acttcaccac agcccctgcc  
3241 atctgccacg atggcaaggc ccaacttcca agggagggcg tgttcgtgtc caacggcacc  
3301 cactgggttg tgacacagcg caatttctac gagccccaga tcatcaccac agacaacacc  
3361 ttcgtgagcg gcaactgtga cgtggctcctc ggcacgtgta acaataccgt gtatgatcca  
3421 ctccagcccg agctggacag ctttaaggag gagctggata agtatttcaa gaatcacacc  
3481 tcccctgacg tggatctggg cgacatcagc ggcacatg cctccgtggg gaacatccag  
3541 aaggagatcg accgcctgaa cgaggtggct aagaatctga acgagagcct gatcgacctc  
3601 caggagctgg gcaagtatga gcagtacatc aagtggcccG GaGGCAGCGG aGGCTACATC  
3661 CCCGAGGCCC CtCGCGAtGG aCAGGctTAC GTGCGCAAGG ACGGCGAGTG GGTGCTGCTG  
3721 AGCACCTTCC TGGGCGGAGG AGGATCTGGA GGTGGATCCG TGAGCGGCTG GCGGCTGTTC  
3781 AAGAAGATTA GCGGCGGAAG CCATCATCAC CACCATCATC ACCATTGA

#### 10. $\beta$ 10-S- $\beta$ 10

1 ATGCGGCTTC CGGGTGCAT GCCAGCTCTG GCCCTCAAAG GCGAGCTGCT GTTGCTGTCT  
61 CTCCTGTTAC TTCTGGAACC ACAGATCTCT CAGGGCGGTG GaGTGAGCGG CTGGCGGCTG  
121 TTCAAGAAGA TTAGtGGTGG CGGAGGATCT GGAGGTGGAT Cctgctcaa tctgacaact  
181 cggactcagc tgccacctgc ttataactaat agcttcacca gaggcgtgta ctatcctgac  
241 aaggtgttta gaagctccgt gctgcactct acacaggatc tgtttctgcc attcttttagc  
301 aacgtgacct ggttccacgc catccacgtg agcggcacca atggcacaaa gcggttcgac  
361 aatcccgtgc tgctttttaa cgatggcgtg tacttctgct ctaccgagaa gagcaacatc  
421 atcagaggct ggatctttgg caccacactg gactccaaga cacagtctct gctgatcgtg  
481 aacaatgcca ccaacgtggt catcaaggtg tgcgagttcc agttttgtaa tgatcccttc

541 ctgggctgt actatcacia gaacaataag agctggatgg agtccgagtt tagagtgtat  
601 tctagcgcca acaactgcac atttgagtag gtgagccagc ctttctgat ggacctggag  
661 ggcaagcagg gcaatttcaa gaacctgagg gagttcgtgt ttaagaatat cgacggctac  
721 ttcaaaatct actctaagca ccccccatc aacctgggtgc gcgacctgcc tcagggttc  
781 agcgccctgg agcccctggt ggatctgcct atcggcatca acatcacccg gtttcagaca  
841 ctgctggccc tgcacagaag ctacctgaca cccggcgact cctctagcgg atggaccgcc  
901 ggcgctgccc cctactatgt gggtacctc cagccccgga ctttctgct gaagtacaac  
961 gagaatggca ccatcacaga cgcagtggat tgcgccctgg accccctgag cgagacaaag  
1021 tgtacactga agtcctttac cgtggagaag ggcattctatc agacatccaa tttcagggtg  
1081 cagccaaccg agtctatcgt gcgctttcct aatatcacia acctgtgccc atttggcgag  
1141 gtgttcaacg caaccgcctt cgcacgcgtg tacgcctgga ataggaagcg gatcagcaac  
1201 tgcgtggccc actatagcgt gctgtacaac tccgcctctt tcagcacctt taagtctat  
1261 ggcgctgccc ccacaaagct gaatgacctg tgctttacca acgtctacgc cgattctttc  
1321 gtgatcaggg gcgacgaggt gcgacagatc gccccggcc agacaggcaa gatcgagac  
1381 tacaattata agctgccaga cgatttcacc ggctgctga tcgctggaa cagcaacaat  
1441 ctggattcca aagtggcggg caactacaat tatctgtacc ggctgtttag aaagagcaat  
1501 ctgaagccct tcgagagggg catctctaca gaaatctacc aggcggcag cacccttgc  
1561 aatggcgtgg agggctttaa ctgttatttc ccaactccagt cctacggctt ccagcccaca  
1621 aacggcgtgg gctatcagcc ttaccgcgtg gtgggtgctga gctttgagct gctgcacgcc  
1681 ccagcaacag tgtgcccggc caagaagtcc accaatctgg tgaagaacaa gtgctgaac  
1741 ttcaacttca acggcctgac cggcacaggc gtgctgacc agtccaacaa gaagtctctg  
1801 ccatttcagc agttcggcag ggacatcgca gataccacag acgcccgtgc cgaccacag  
1861 accctggaga tccctggacat cacaccctgc tctttcggcg gcgtgagcgt gatcacacc  
1921 ggcaccaata caagcaacca ggtggccgtg ctgtatcagg acgtgaattg taccgaggtg  
1981 cccgtggcta tccacgccga tcagctgacc ccaacatggc ggggtgtacag caccggctcc  
2041 aacgtcttcc agacaagagc cggatgcctg atcggagcag agcacgtgaa caattcctat  
2101 gagtgcgaca tcccaatcgg cgcggcctc tctatcatcg cctataccat gtccctgggc  
2161 cccGgaagCg ccAgCagcgt ggcctcccag tctatcatcg cctataccat gtccctgggc  
2221 gccgagaaca gcgtggccta ctctaacaat agcatcgcca tcccaaccaa cttcacaatc  
2281 tctgtgacca cagagatcct gccgctgctc atgaccaaga catctgtgga ctgcacaatg  
2341 tatatctgtg cgattctac cgagtgcagc aacctgctgc tccagtagc gagctttgt  
2401 acccagctga atagagccct gacaggcctc gccgtggagc aggataagaa cacacaggag  
2461 gtgttcgccc aggtgaagca aatctacaag accccccta tcaaggactt tggcgcttc  
2521 aatttttccc agatcctgcc tgatccatcc aagccttcta agcggagctt tatcgaggac  
2581 ctgctgttca acaaggtgac cctggccgat gccggcttca tcaagcagta tggcgattgc  
2641 ctgggcgaca tcgcagccag ggacctgatc tgcgcccaga agtttaatgg cctgaccgtg  
2701 ctgccacccc tgctgacaga tgagatgatc gcacagtaca caagcgcctt gctggccggc  
2761 accatcacat ccggatggac cttcggcgca ggagccgcc tccagatccc ctttgccatg  
2821 cagatggcct ataggttcaa cggcatcggc gtgaccaga atgtgctgta cgagaaccag  
2881 aagctgatcg ccaatcagtt taactccgcc atcggcaaga tccaggacag cctgtcctct  
2941 acagccagcg ccctgggcaa gctccaggat gtgggtgaatc agaacgcca ggccctgaat  
3001 accctggtga agcagctgag cagcaacttc ggcgcatct ctagectgct gaatgacatc  
3061 ctgagccggc tggacCCTCC Tgaggcagag gtgcagatcg accggctgat caccggccgg  
3121 ctccagagcc tccagaccta tgtgacacag cagctgatca gggccgcca gatcagggcc  
3181 agcgcacaatc tggcagcaac caagatgtcc gagtgcgtgc tgggccagtc taagagagtg  
3241 gacttttctg gcaagggcta tcacctgatc tcttccctc agtctgccc acacggcgtg  
3301 gtgtttctgc acgtgacctc cgtgcccgcc caggagaaga acttcaccac agcccctgcc  
3361 atctgccacg atggcaaggc ccaactttca agggagggcg tgttcgtgtc caacggcacc  
3421 cactggtttg tgacacagcg caatttctac gagcccaga tcatcaccac agacaacacc  
3481 ttcgtgagcg gcaactgtga cgtggctatc ggcattcgtga acaataccgt gtatgatcca  
3541 ctccagcccc agctggacag ctttaaggag gagctggata agtatttcaa gaatcacacc  
3601 tcccctgacg tggatctggg cgacatcagc ggcattcaatg cctccgtggg gaacatccag  
3661 aaggagatcg accgcctgaa cgaggtggct aagaatctga acgagagcct gatcgacctc  
3721 caggagctgg gcaagtatga gcagtacatc aagtggcccG GaGGCAGCGG aGGCTACATC  
3781 CCCGAGGCC CtcGCGAtGG aCAGGctTAC GTGCGCAAGG ACGGCGAGTG GGTGCTGCTG  
3841 AGCACCTTCC TGGGCGGAGG AGGATCTGGA GGTGGATCCG TGAGCGGCTG GCGGCTGTTC  
3901 AAGAAGATTA GCGGCGGAAG CCATCATCAC CACCATCATC ACCATTGA

## Supplementary Fig. 1

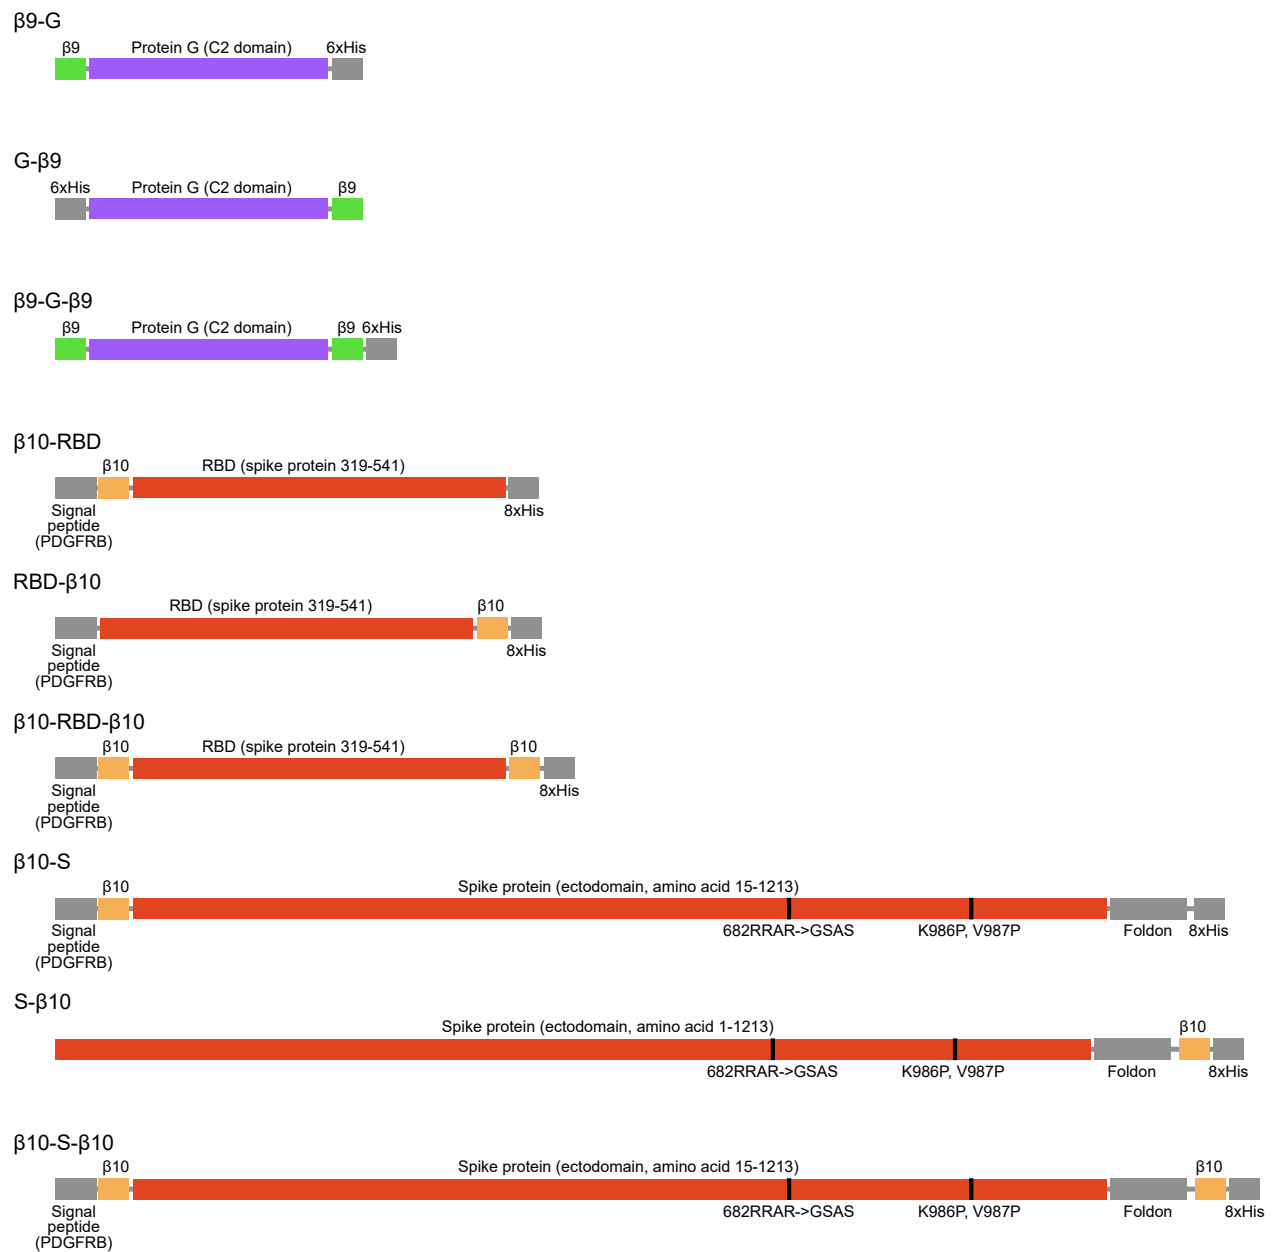

**Supplementary Figure 1.** Schematic representation of SATiN probes.

## Supplementary Fig. 2

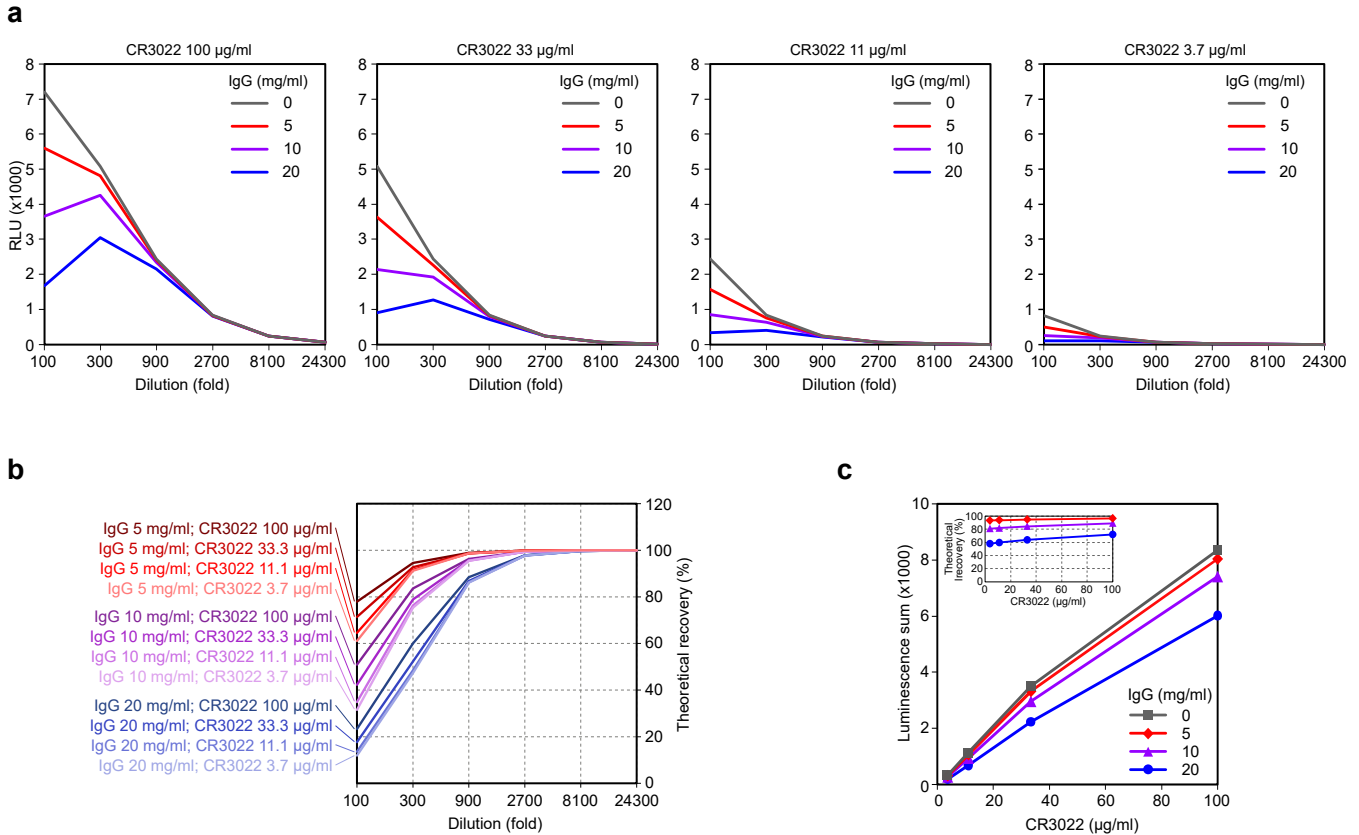

**Supplementary Figure 2.** Computational simulation of inhibitory effects of IgG on the SATIN assay. **A.** Virtual samples containing CR3022 (3.7, 11, 33 and 100  $\mu\text{g}/\text{mL}$ ) in the presence of IgG at different levels (5, 10, and 20  $\text{mg}/\text{mL}$ ) were serially diluted as indicated. Their tNLuc signals at each dilution endpoint were calculated using the chemical kinetics model derived from the experimental data shown in **Fig. 2B**. **B.** Theoretical recovery rates of samples in **A** at different dilutions were calculated by dividing the calculated reading of a virtual sample in **A** by the corresponding virtual sample not containing IgG. **C.** The overall tNLuc signal of each virtual sample was calculated by luminescence summation of the calculated signals at the 1:300, 1:900 and 1:2700 dilutions obtained in **A**. Overall recovery rates are presented inset.

### Supplementary Figure 3

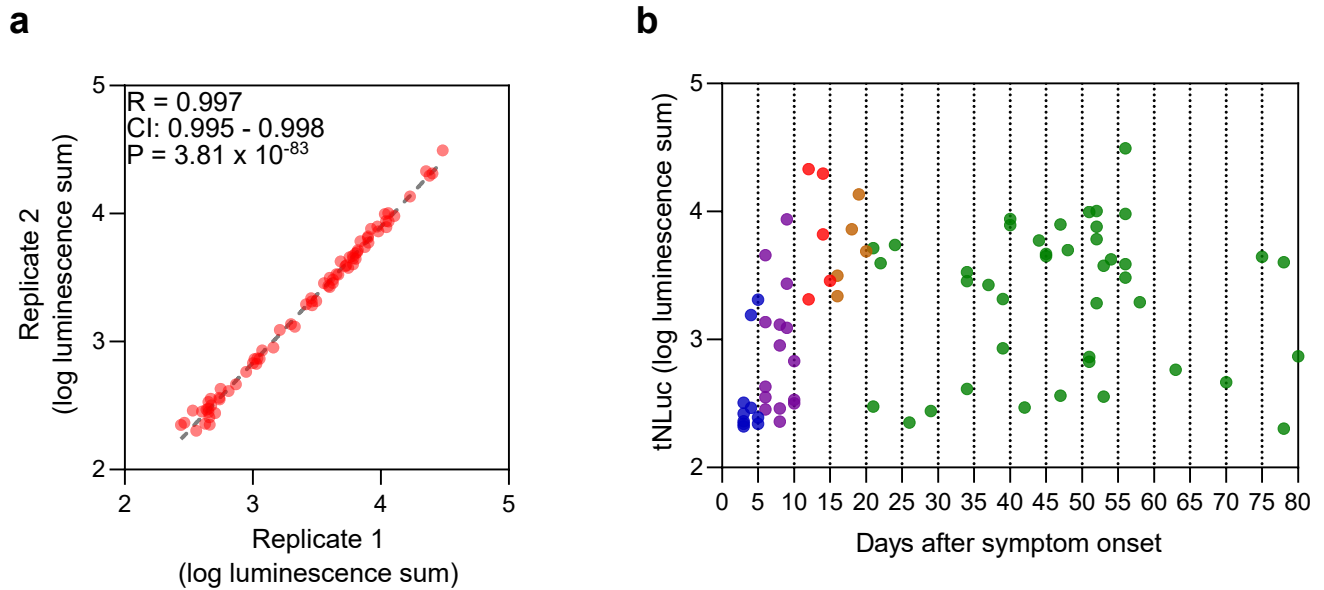

**Supplementary Figure 3.** Detection of  $\alpha$ -SARS CoV-2 antibody in serum samples with the SATiN assay. **A.** 70 serum samples collected from COVID-19 patients or convalescents were analyzed in two independent replicates using the SATiN assay. The two sets of data are presented as a scatter plot. R and P values were obtained from two tailed Pearson analysis. **B.** SATiN luminescence signal of 80 samples plotted against the time of sample collection.
